# Supplementary material for: Understanding Primary Care Physicians’ Comprehension of Eye Care Notes to Improve Diabetes Care Coordination
Source: Research Square preprint supplement (doi:10.21203/rs.3.rs-10146623/v1), 2026-07-03
Supplement: Supplementary file 1 [file cd784edfd45eb6ac3464f7c9.docx]

**Supplementary Information**

**Supplementary Method 1: Survey Questions**

1. How many years have you been practicing medicine?
2. Did you complete a dedicated rotation in ophthalmology during medical school?
3. How long was your rotation?
4. Do you read eye care (ophthalmology or optometry) progress notes?
5. The following questions are based on your impression of eye care notes:
   1. In general, I can understand eye care notes (yes/no)
   2. I feel confident in understanding eye examination findings (yes/no)
6. What do you do when you don’t understand parts of eye care notes? Select one of the following:
   1. Ask IM/FM/endocrinology colleagues
   2. Ask ophthalmology/optometry colleagues
   3. Ask the referred eye care provider
   4. Refer to medical textbooks
   5. Other
7. The following are based on your impression of eye care notes:
   1. In general, I can understand eye care notes (yes/no)
   2. I feel confident in understanding the eye examination findings (yes/no)
   3. I feel confident in understanding the assessment and plan (yes/no)
8. For each sample eye care note (3 total):
   1. Was the patient dilated for their eye exam? (yes/no/unsure)
   2. Does the patient have diabetic retinopathy (yes/no/unsure)
9. Please let us know any thoughts or comments you have regarding understanding eye exam notes or communication regarding diabetic retinopathy screening.

**Supplementary Method 2A: Sample Note 1 representing a patient with diabetic retinopathy on dilated fundus exam**

The patient has a history of DM2.

• VA: 20/40 OD, 20/32 OS

• Tonometry: 9 OD, 8 OS

• Pupils: PERL OU

• Dilation: Combination @ 10:43 am

Slit Lamp Exam

|  | Right | Left |
| --- | --- | --- |
| Lids/Lashes | Normal for age | Normal for age |
| Conjunctiva/Sclera | White and quiet | White and quiet |
| Cornea | Clear | Clear |
| Anterior Chamber | Deep and quiet | Deep and quiet |
| Iris | Round, no rubeosis | Round, no rubeosis |
| Lens | Posterior chamber intraocular lens | Posterior chamber intraocular lens |

Fundus Exam

|  | Right | Left |
| --- | --- | --- |
| Disc | Healthy contour and size | Healthy contour and size |
| Macula | Few intraretinal cysts, ERM, MAs | Tr ERM, no edema |
| Vessels | Normal | Normal |
| Periphery | Scattered IRH, flat and attached 360 degrees | Scattered IRH, flat and attached 360 degrees |

Assessment and Plan

• #DM2 with mod NPDR OU: Stable; continue BP/BG control

• #DME OD: Last IVA two months ago, good VA, no progression, obs

**Supplementary Method 2B: Sample Note 2 representing a patient without diabetic retinopathy on dilated fundus exam**

The patient has a history of DM2.

• VA: 20/20 OD, 20/30 OS

• Tonometry: 15 OD, 17 OS

• Pupils: PERL OU

• Dilation: Combination @ 2:40 pm

Slit Lamp Exam

|  | Right | Left |
| --- | --- | --- |
| Lids/Lashes | Normal for age | Normal for age |
| Conjunctiva/Sclera | White and quiet | White and quiet |
| Cornea | Clear | Clear |
| Anterior Chamber | Deep and quiet | Deep and quiet |
| Iris | Round, no rubeosis | Round, no rubeosis |
| Lens | 4+ NSC | 1–2+ NSC |

Fundus Exam

|  | Right | Left |
| --- | --- | --- |
| Disc | Healthy contour and size | Healthy contour and size |
| Macula | Few small drusen | Few small drusen |
| Vessels | Normal | Normal |
| Periphery | Flat and attached 360 degrees | Flat and attached 360 degrees |

Assessment and Plan

• #AMD OU: no CNV, cont AREDS, obs

• #DM2 without DR: continue BP/BG control, annual exam

**Supplementary Method 2C: Sample Note 3 representing a Patient who did not receive a dilated fundus exam**

The patient has a history of DM2.

• VA: 20/20 OD, 20/20 OS

• Tonometry: 13 OD, 12 OS

• Pupils: PERL OU

• Dilation: Deferred

Slit Lamp Exam

|  | Right | Left |
| --- | --- | --- |
| Lids/Lashes | Normal for age | Normal for age |
| Conjunctiva/Sclera | White and quiet | White and quiet |
| Cornea | Clear | Clear |
| Anterior Chamber | Deep and quiet | Deep and quiet |
| Iris | Round, no rubeosis | Round, no rubeosis |
| Lens | PCIOL with 1+ PCO in central axis | PCIOL |

Assessment and Plan

• #PCO OD: Not VS, obs.
